# Supplementary material for: Integrative analysis of multi-omics data reveals distinct impacts of DDB1-CUL4 associated factors in human lung adenocarcinomas
Source: PubMed Central journal article supplement (PMC5428704; doi:10.1038/s41598-017-00512-1), 2017-03-23
Supplement: 41598_2017_512_MOESM1_ESM.pdf [file 41598_2017_512_MOESM1_ESM.pdf]

# **Integrative analysis of multi-omics data reveals distinct impacts of DDB1-CUL4 associated factors in human lung adenocarcinomas**

Hong Yan<sup>1,2,7</sup>, Lei Bi<sup>2,3,7</sup>, Yunshan Wang<sup>2,4,7</sup>, Xia Zhang<sup>5</sup>, Zhibo Hou<sup>6</sup>, Qian Wang<sup>1</sup>, Antoine M Snijders<sup>2</sup>, Jian-Hua Mao<sup>2\*</sup>

<sup>1</sup>Department of Laboratory Medicine, Nanjing Chest Hospital, 215 Guangzhou Road, Nanjing 210029, China.

<sup>2</sup>Biological Systems and Engineering Division, Lawrence Berkeley National Laboratory, Berkeley, California, USA.

<sup>3</sup>Department of Preclinical Medicine, Nanjing University of Chinese Medicine, 138 Xianlin Road, Nanjing 210023, China

<sup>4</sup>International Biotechnology R&D Center, Shandong University School of Ocean, Weihai, Shandong 264209, China.

<sup>5</sup>Department of Tuberculosis, Nanjing Chest Hospital, 215 Guangzhou Road, Nanjing 210029, China.

<sup>6</sup>Department of First Respiratory, Nanjing Chest Hospital, 215 Guangzhou Road, Nanjing 210029, China.

<sup>7</sup>These authors contributed equally.

\*Correspondence to: Jian-Hua Mao: [JHMao@lbl.gov](mailto:JHMao@lbl.gov)

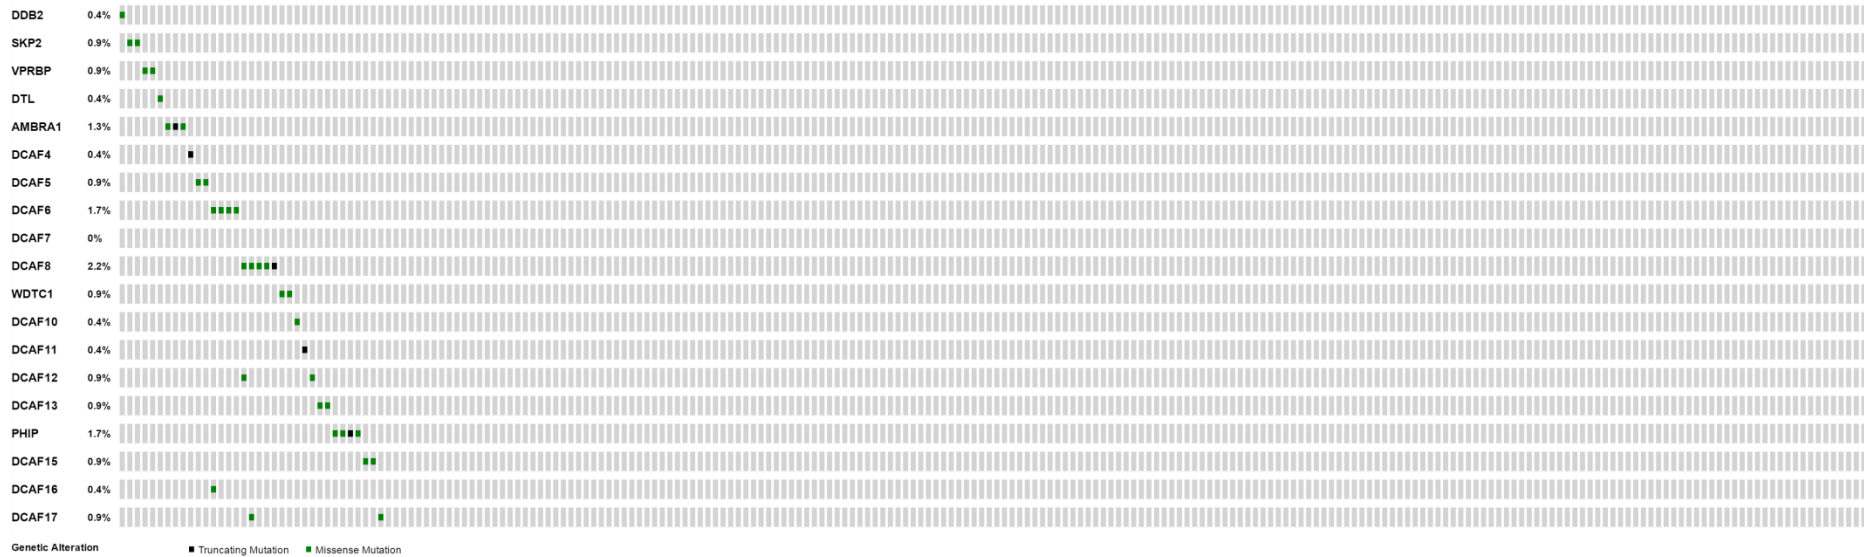

**Figure S1.** Mutation frequency of DCAFs in lung adenocarcinomas

**Table S1.** The p-values and fold change (FC) for DCAFs between LuADCs and normal lung tissues. Bold cases reached the following criteria: adjusted p-value <0.05 and fold change > 2 (logFC > 0.3).

| Gene           | Affymetrix probe | GSE19188         |                 |               | GSE31210         |                 |               | GSE19804         |                 |               |
|----------------|------------------|------------------|-----------------|---------------|------------------|-----------------|---------------|------------------|-----------------|---------------|
|                |                  | Adjusted p-Value | p-Value         | logFC         | Adjusted p-Value | p-Value         | logFC         | Adjusted p-Value | p-Value         | logFC         |
| DDB2           | 203409_at        | <b>2.70E-04</b>  | <b>6.85E-05</b> | <b>-0.378</b> | 8.72E-01         | 7.97E-01        | -0.028        | 7.40E-02         | 3.20E-02        | 0.206         |
| SKP2           | 203626_s_at      | 1.23E-03         | 3.71E-04        | 0.256         | 6.27E-01         | 4.83E-01        | 0.176         | 2.93E-01         | 1.79E-01        | 0.131         |
|                | 210567_s_at      | 2.28E-03         | 7.48E-04        | 0.289         | 9.04E-01         | 8.46E-01        | 0.023         | 5.59E-01         | 4.25E-01        | 0.093         |
|                | 203625_x_at      | <b>1.77E-07</b>  | <b>2.24E-08</b> | <b>0.821</b>  | 7.47E-02         | 2.97E-02        | 0.309         | <b>8.35E-05</b>  | <b>1.32E-05</b> | <b>0.621</b>  |
| VPRBP (DCAF1)  | 204376_at        | <b>2.16E-13</b>  | <b>7.97E-15</b> | <b>-0.697</b> | <b>1.37E-04</b>  | <b>1.88E-05</b> | <b>-0.684</b> | <b>1.98E-05</b>  | <b>2.67E-06</b> | <b>-0.350</b> |
|                | 226476_s_at      | 6.37E-01         | 5.58E-01        | 0.037         | 8.38E-01         | 7.50E-01        | 0.030         | 5.91E-01         | 4.59E-01        | 0.044         |
|                | 226477_at        | 5.88E-05         | 1.26E-05        | 0.285         | 7.78E-04         | 1.37E-04        | 0.253         | 4.27E-01         | 2.94E-01        | 0.063         |
|                | 204377_s_at      | <b>2.93E-11</b>  | <b>1.71E-12</b> | <b>-0.505</b> | <b>6.43E-04</b>  | <b>1.10E-04</b> | <b>-0.515</b> | 1.89E-03         | 4.38E-04        | -0.250        |
|                | 226481_at        | 6.34E-01         | 5.56E-01        | 0.036         | 7.99E-03         | 2.05E-03        | 0.184         | 7.95E-01         | 7.01E-01        | 0.023         |
| DTL (DCAF2)    | 218585_s_at      | <b>1.65E-11</b>  | <b>9.18E-13</b> | <b>1.736</b>  | 1.60E-01         | 7.67E-02        | 0.399         | <b>1.73E-02</b>  | <b>5.68E-03</b> | <b>0.571</b>  |
|                | 222680_s_at      | <b>2.60E-14</b>  | <b>7.80E-16</b> | <b>1.627</b>  | <b>1.91E-02</b>  | <b>5.74E-03</b> | <b>0.606</b>  | <b>1.02E-02</b>  | <b>3.06E-03</b> | <b>0.572</b>  |
| AMBRA1 (DCAF3) | 234237_s_at      | 1.39E-02         | 5.97E-03        | 0.075         | 3.73E-01         | 2.33E-01        | 0.340         | 8.85E-01         | 8.22E-01        | -0.014        |
|                | 219141_s_at      | 5.86E-01         | 5.04E-01        | 0.031         | 2.48E-01         | 1.35E-01        | 0.114         | 1.98E-05         | 2.67E-06        | 0.205         |
|                | 52731_at         | 9.05E-01         | 8.74E-01        | -0.012        | 1.06E-01         | 4.60E-02        | 0.125         | 2.04E-04         | 3.56E-05        | 0.229         |
| DCAF4          | 214758_at        | 1.22E-01         | 7.55E-02        | 0.098         | 7.00E-01         | 5.69E-01        | -0.072        | 5.13E-01         | 3.78E-01        | 0.037         |
|                | 226938_at        | <b>1.63E-04</b>  | <b>3.89E-05</b> | <b>0.357</b>  | <b>7.18E-03</b>  | <b>1.81E-03</b> | <b>0.364</b>  | <b>1.30E-05</b>  | <b>1.67E-06</b> | <b>0.370</b>  |
| DCAF5          | 1554558_at       | 5.80E-02         | 3.14E-02        | 0.095         | 7.87E-01         | 6.79E-01        | -0.093        | 3.74E-01         | 2.47E-01        | -0.035        |
|                | 224696_s_at      | 2.18E-03         | 7.11E-04        | -0.158        | 4.03E-02         | 1.40E-02        | -0.252        | 6.47E-01         | 5.21E-01        | 0.043         |
|                | 224697_at        | 3.85E-03         | 1.35E-03        | -0.201        | 5.26E-01         | 3.76E-01        | -0.088        | 9.63E-01         | 9.40E-01        | -0.005        |
|                | 224703_at        | 4.34E-02         | 2.24E-02        | -0.127        | 6.42E-01         | 5.00E-01        | 0.055         | 1.03E-01         | 4.80E-02        | 0.180         |
|                | 227251_at        | <b>2.77E-08</b>  | <b>2.99E-09</b> | <b>-0.408</b> | 3.81E-01         | 2.40E-01        | -0.103        | 5.04E-02         | 2.02E-02        | -0.168        |
| DCAF6          | 217908_s_at      | 8.97E-02         | 5.26E-02        | -0.130        | 4.10E-01         | 2.66E-01        | 0.099         | 8.58E-01         | 7.86E-01        | 0.018         |
|                | 232349_x_at      | 1.13E-01         | 6.92E-02        | 0.106         | 1.72E-01         | 8.45E-02        | 0.174         | 3.62E-01         | 2.37E-01        | 0.090         |
| DCAF7          | 224748_at        | 2.15E-01         | 1.49E-01        | 0.097         | <b>4.14E-07</b>  | <b>2.56E-08</b> | <b>0.391</b>  | 1.52E-02         | 4.86E-03        | 0.182         |
|                | 209592_s_at      | <b>1.05E-03</b>  | 3.10E-04        | 0.224         | 9.70E-01         | 9.51E-01        | 0.005         | 7.91E-01         | 6.95E-01        | -0.022        |
|                | 221745_at        | <b>9.27E-06</b>  | <b>1.66E-06</b> | <b>0.535</b>  | <b>1.65E-03</b>  | <b>3.27E-04</b> | <b>0.309</b>  | 2.26E-01         | 1.29E-01        | 0.164         |
|                | 224730_at        | <b>1.96E-03</b>  | <b>6.29E-04</b> | <b>0.408</b>  | 4.19E-01         | 2.73E-01        | 0.080         | 4.01E-01         | 2.70E-01        | -0.137        |
|                | 221744_at        | 4.44E-01         | 3.58E-01        | 0.071         | 8.03E-01         | 7.01E-01        | 0.025         | 4.41E-01         | 3.07E-01        | 0.079         |

|                  |              |                 |                 |               |                 |                 |               |                 |                 |              |
|------------------|--------------|-----------------|-----------------|---------------|-----------------|-----------------|---------------|-----------------|-----------------|--------------|
| DCAF8            | 202250_s_at  | <b>5.32E-06</b> | <b>9.06E-07</b> | <b>-0.428</b> | 5.92E-01        | 4.45E-01        | -0.087        | 9.31E-01        | 8.89E-01        | 0.012        |
|                  | 202249_s_at  | 9.36E-01        | 9.13E-01        | -0.004        | 1.12E-01        | 4.93E-02        | 0.206         | 4.21E-02        | 1.63E-02        | 0.145        |
|                  | 216885_s_at  | 1.67E-02        | 7.37E-03        | -0.152        | 9.28E-01        | 8.82E-01        | -0.015        | 4.44E-01        | 3.10E-01        | 0.062        |
|                  | 1554049_s_at | 4.35E-02        | 2.24E-02        | -0.129        | 6.41E-01        | 4.99E-01        | -0.075        | 2.84E-01        | 1.73E-01        | -0.071       |
| WDTC1<br>(DCAF9) | 216036_x_at  | 4.10E-01        | 3.25E-01        | 0.065         | 4.02E-01        | 2.59E-01        | 0.101         | 2.59E-01        | 1.53E-01        | 0.093        |
|                  | 40829_at     | 2.07E-02        | 9.46E-03        | -0.160        | 7.53E-02        | 3.00E-02        | 0.121         | 5.30E-01        | 3.95E-01        | 0.058        |
|                  | 215497_s_at  | 3.95E-01        | 3.10E-01        | -0.063        | 7.45E-01        | 6.26E-01        | 0.033         | 1.30E-02        | 4.07E-03        | 0.129        |
| DCAF10           | 219001_s_at  | 3.65E-03        | 1.28E-03        | -0.292        | <b>1.14E-03</b> | <b>2.13E-04</b> | <b>-0.320</b> | 9.34E-02        | 4.26E-02        | -0.179       |
|                  | 226511_at    | 8.93E-01        | 8.59E-01        | -0.014        | <b>5.95E-04</b> | <b>1.01E-04</b> | <b>-0.334</b> | 3.44E-01        | 2.21E-01        | -0.115       |
|                  | 230679_at    | 7.24E-01        | 6.56E-01        | 0.043         | 6.86E-03        | 1.72E-03        | -0.252        | 3.18E-01        | 2.00E-01        | -0.121       |
|                  | 222804_x_at  | <b>6.55E-04</b> | <b>1.84E-04</b> | <b>0.336</b>  | <b>1.04E-03</b> | <b>1.91E-04</b> | <b>0.363</b>  | 8.91E-01        | 8.31E-01        | 0.024        |
| DCAF11           | 201886_at    | 7.39E-01        | 6.73E-01        | 0.025         | 3.99E-01        | 2.56E-01        | 0.112         | 5.45E-03        | 1.49E-03        | 0.230        |
|                  | 216389_s_at  | 1.97E-03        | 6.33E-04        | 0.254         | <b>4.08E-03</b> | <b>9.38E-04</b> | <b>0.528</b>  | 1.31E-01        | 6.44E-02        | 0.189        |
| DCAF12           | 224789_at    | <b>2.10E-06</b> | <b>3.29E-07</b> | <b>0.378</b>  | <b>4.14E-06</b> | <b>3.51E-07</b> | <b>0.619</b>  | <b>2.25E-10</b> | <b>9.84E-12</b> | <b>0.628</b> |
| DCAF13           | 225676_s_at  | <b>1.60E-13</b> | <b>5.71E-15</b> | <b>0.940</b>  | <b>9.51E-06</b> | <b>9.04E-07</b> | <b>0.546</b>  | <b>2.01E-07</b> | <b>1.66E-08</b> | <b>0.566</b> |
|                  | 220843_s_at  | 2.49E-03        | 8.28E-04        | 0.212         | 7.15E-01        | 5.88E-01        | 0.082         | 3.46E-01        | 2.23E-01        | 0.048        |
|                  | 231784_s_at  | <b>1.50E-09</b> | <b>1.24E-10</b> | <b>0.868</b>  | <b>5.82E-04</b> | <b>9.81E-05</b> | <b>0.483</b>  | <b>1.25E-03</b> | <b>2.71E-04</b> | <b>0.543</b> |
| PHIP<br>(DCAF14) | 244811_at    | 9.89E-01        | 9.85E-01        | 0.002         | <b>8.20E-03</b> | <b>2.11E-03</b> | <b>0.317</b>  | 7.00E-01        | 5.83E-01        | -0.073       |
|                  | 212542_s_at  | 1.15E-01        | 7.07E-02        | -0.145        | 4.91E-01        | 3.40E-01        | -0.094        | 9.43E-01        | 9.09E-01        | 0.011        |
|                  | 213074_at    | 4.18E-01        | 3.33E-01        | -0.061        | 5.02E-01        | 3.51E-01        | 0.080         | 2.10E-01        | 1.17E-01        | 0.138        |
| DCAF15           | 221849_s_at  | 1.26E-01        | 7.89E-02        | 0.160         | 6.77E-01        | 5.41E-01        | 0.081         | 1.99E-01        | 1.09E-01        | 0.127        |
|                  | 221851_at    | 2.36E-02        | 1.10E-02        | 0.187         | 6.32E-01        | 4.88E-01        | 0.225         | 9.31E-01        | 8.90E-01        | 0.015        |
|                  | 91952_at     | 2.30E-01        | 1.61E-01        | 0.128         | 9.94E-01        | 9.90E-01        | -0.001        | 4.05E-01        | 2.74E-01        | 0.074        |
| DCAF16           | 239187_at    | 2.92E-01        | 2.15E-01        | 0.043         | 9.48E-01        | 9.16E-01        | -0.028        | 1.62E-01        | 8.42E-02        | 0.062        |
|                  | 219717_at    | <b>3.30E-05</b> | <b>6.70E-06</b> | <b>0.467</b>  | <b>4.38E-03</b> | <b>1.02E-03</b> | <b>0.312</b>  | 7.38E-01        | 6.29E-01        | 0.045        |
|                  | 228106_at    | 5.96E-02        | 3.24E-02        | 0.178         | 5.61E-01        | 4.12E-01        | -0.073        | 8.16E-01        | 7.28E-01        | -0.028       |
| DCAF17           | 231921_at    | 2.33E-01        | 1.64E-01        | 0.147         | <b>4.29E-04</b> | <b>6.92E-05</b> | <b>0.381</b>  | 9.01E-01        | 8.46E-01        | -0.022       |
|                  | 220172_at    | 1.84E-04        | 4.47E-05        | 0.274         | <b>2.66E-08</b> | <b>1.14E-09</b> | <b>0.754</b>  | 3.24E-01        | 2.05E-01        | 0.135        |

**Table S2.** The impact of DCAFs on overall survival. Genes highlighted in red indicate consistent significance was observed across independent probe sets for a specific gene.

| Gene   | K-M Plotter analysis of microarray data |                  |           | Cox regression analysis of TCGA data |          |
|--------|-----------------------------------------|------------------|-----------|--------------------------------------|----------|
|        | Affymetrix probe                        | HR (95% CI)      | p-value   | HR (95% CI)                          | p-value  |
| DDB2   | 203409_at                               | 0.70 (0.55-0.90) | 4.40E-03  | 0.96 (0.84-1.11)                     | 0.60     |
| SKP2   | 203626_s_at                             | 1.87 (1.48-2.36) | 1.00E-07  | 1.03 (0.99-1.07)                     | 0.21     |
|        | 210567_s_at                             | 1.64 (1.29-2.08) | 4.20E-05  |                                      |          |
|        | 203625_x_at                             | 0.69 (0.55-0.87) | 1.70E-03  |                                      |          |
| VPRBP  | 204376_at                               | 0.70 (0.55-0.89) | 3.40E-03  | 0.92 (0.81-1.05)                     | 0.22     |
|        | 226476_s_at                             | 1.86 (1.46-2.36) | 2.90E-07  |                                      |          |
|        | 226477_at                               | 1.56 (1.22-2.00) | 3.40E-04  |                                      |          |
|        | 204377_s_at                             | 0.53 (0.42-0.67) | 1.20E-07  |                                      |          |
| DTL    | 226481_at                               | 0.39 (0.29-0.52) | 8.20E-11  | 1.25 (1.12-1.40)                     | 0.000052 |
|        | 218585_s_at                             | 1.65 (1.28-2.13) | 1.10E-04  |                                      |          |
| AMBRA1 | 222680_s_at                             | 2.36 (1.80-3.08) | 1.00E-10  | 0.93 (0.81-1.05)                     | 0.25     |
|        | 234237_s_at                             | 1.35 (1.05-1.73) | 1.80E-02  |                                      |          |
|        | 219141_s_at                             | 0.47 (0.37-0.60) | 6.10E-10  |                                      |          |
| DCAF4  | 52731_at                                | 0.47 (0.37-0.59) | 8.80E-11  | 0.94 (0.83-1.06)                     | 0.32     |
|        | 214758_at                               | 0.65 (0.52-0.82) | 3.10E-04  |                                      |          |
| DCAF5  | 226938_at                               | 0.53 (0.42-0.68) | 2.30E-07  | 0.93 (0.84-1.03)                     | 0.15     |
|        | 1554558_at                              | 1.56 (1.22-2.00) | 3.30E-04  |                                      |          |
|        | 224696_s_at                             | 0.35 (0.25-0.50) | 4.70E-10  |                                      |          |
|        | 224697_at                               | 0.81 (0.62-1.06) | 1.20E-01  |                                      |          |
| DCAF6  | 224703_at                               | 0.72 (0.56-0.93) | 9.80E-03  | 0.95 (0.86-1.05)                     | 0.29     |
|        | 227251_at                               | 0.77 (0.59-1.00) | 5.40E-02  |                                      |          |
|        | 217908_s_at                             | 0.34 (0.25-0.46) | 7.70E-14  |                                      |          |
| DCAF7  | 232349_x_at                             | 1.24 (0.97-1.58) | 8.50E-02  | 0.97 (0.86-1.09)                     | 0.61     |
|        | 224748_at                               | 1.35 (1.05-1.75) | 2.10E-02  |                                      |          |
|        | 209592_s_at                             | 2.14 (1.69-2.70) | 5.40E-11  |                                      |          |
|        | 221745_at                               | 1.73 (1.35-2.23) | 1.60E-05  |                                      |          |
| DCAF8  | 224730_at                               | 0.68 (0.53-0.87) | 1.80E-03  | 0.96 (0.88-1.06)                     | 0.42     |
|        | 221744_at                               | 1.90 (1.50-2.42) | 1.00E-07  |                                      |          |
|        | 202250_s_at                             | 0.61 (0.47-0.78) | 8.10E-05  |                                      |          |
|        | 202249_s_at                             | 1.54 (1.18-2.01) | 1.40E-03  |                                      |          |
| WDTC1  | 216885_s_at                             | 1.54 (1.22-1.94) | 2.40E-04  | 0.83 (0.73-0.94)                     | 0.004    |
|        | 1554049_s_at                            | 0.37 (0.29-0.47) | <1.00E-16 |                                      |          |
|        | 216036_x_at                             | 1.69 (1.34-2.14) | 8.00E-06  |                                      |          |
| DCAF10 | 40829_at                                | 1.89 (1.46-2.44) | 6.70E-07  | 1.02 (0.90-1.15)                     | 0.76     |
|        | 215497_s_at                             | 0.58 (0.46-0.74) | 7.10E-06  |                                      |          |
|        | 219001_s_at                             | 1.58 (1.25-2.00) | 1.30E-04  |                                      |          |
|        | 226511_at                               | 0.45 (0.34-0.60) | 2.40E-08  |                                      |          |
|        | 230679_at                               | 0.33 (0.23-0.49) | 3.00E-09  |                                      |          |
|        | 222804_x_at                             | 1.22 (0.96-1.55) | 1.10E-01  |                                      |          |

|        |                    |                         |                     |                         |              |
|--------|--------------------|-------------------------|---------------------|-------------------------|--------------|
| DCAF11 | 201886_at          | <b>0.73 (0.57-0.93)</b> | <b>1.20E-02</b>     | <b>0.88 (0.79-0.99)</b> | <b>0.035</b> |
|        | 216389_s_at        | <b>2.96 (2.17-4.03)</b> | <b>4.90E-13</b>     |                         |              |
| DCAF12 | <b>224789_at</b>   | <b>0.60 (0.47-0.77)</b> | <b>3.60E-05</b>     | 0.93 (0.81-1.08)        | 0.34         |
| DCAF13 | 225676_s_at        | 0.79 (0.62-1.01)        | 6.10E-02            | 1.05 (0.98-1.12)        | 0.16         |
|        | 220843_s_at        | <b>0.62 (0.49-0.78)</b> | <b>5.10E-05</b>     |                         |              |
|        | 231784_s_at        | <b>0.58 (0.45-0.74)</b> | <b>6.90E-06</b>     |                         |              |
| PHIP   | 244811_at          | <b>0.27 (0.18-0.39)</b> | <b>7.60E-14</b>     | 0.87 (0.75-1.02)        | 0.081        |
|        | 212542_s_at        | <b>1.40 (1.10-1.79)</b> | <b>6.60E-03</b>     |                         |              |
|        | 213074_at          | <b>0.39 (0.30-0.50)</b> | <b>8.40E-15</b>     |                         |              |
| DCAF15 | <b>221849_s_at</b> | <b>2.37 (1.87-3.01)</b> | <b>2.20E-13</b>     | 0.91 (0.79-1.05)        | 0.19         |
|        | <b>221851_at</b>   | <b>2.52 (1.98-3.21)</b> | <b>1.10E-14</b>     |                         |              |
|        | <b>91952_at</b>    | <b>2.63 (2.08-3.33)</b> | <b>&lt;1.00E-16</b> |                         |              |
| DCAF16 | 239187_at          | <b>1.84 (1.45-2.34)</b> | <b>4.60E-07</b>     | 0.94 (0.84-1.06)        | 0.34         |
|        | 219717_at          | <b>0.60 (0.47-0.77)</b> | <b>3.00E-05</b>     |                         |              |
|        | 228106_at          | <b>1.53 (1.19-1.96)</b> | <b>8.10E-04</b>     |                         |              |
| DCAF17 | 231921_at          | <b>0.61 (0.48-0.77)</b> | <b>3.80E-05</b>     | 1.04 (0.94-1.16)        | 0.43         |
|        | 220172_at          | 0.79 (0.62-1.01)        | 5.60E-02            |                         |              |

**Table S3. List of genes that are co-expressed with DTL**

| Gene      | Spearman correlation coefficient (R) |
|-----------|--------------------------------------|
| EXO1      | 0.89                                 |
| NEK2      | 0.85                                 |
| KIF14     | 0.85                                 |
| CDC6      | 0.84                                 |
| KIF11     | 0.84                                 |
| ORC1      | 0.84                                 |
| BRCA1     | 0.83                                 |
| CENPF     | 0.83                                 |
| ASPM      | 0.83                                 |
| MCM10     | 0.83                                 |
| KIF4A     | 0.83                                 |
| TPX2      | 0.83                                 |
| CKAP2L    | 0.83                                 |
| BUB1B     | 0.82                                 |
| BUB1      | 0.82                                 |
| CDCA5     | 0.82                                 |
| KIF23     | 0.82                                 |
| ZWINT     | 0.82                                 |
| PLK4      | 0.82                                 |
| FANCI     | 0.82                                 |
| NCAPH     | 0.82                                 |
| SGOL1     | 0.82                                 |
| NCAPG     | 0.82                                 |
| CLSPN     | 0.82                                 |
| CENPI     | 0.81                                 |
| MCM6      | 0.81                                 |
| STIL      | 0.81                                 |
| RRM2      | 0.81                                 |
| TOP2A     | 0.81                                 |
| PRC1      | 0.81                                 |
| DLGAP5    | 0.81                                 |
| ARHGAP11A | 0.81                                 |
| DIAPH3    | 0.81                                 |
| KIF15     | 0.81                                 |
| DEPDC1    | 0.81                                 |
| BRIP1     | 0.81                                 |
| CCNA2     | 0.80                                 |
| CHEK1     | 0.80                                 |
| CENPE     | 0.80                                 |
| FAM72A    | 0.80                                 |
| HELLS     | 0.80                                 |
| KIFC1     | 0.80                                 |
| PLK1      | 0.80                                 |
| TTK       | 0.80                                 |
| MELK      | 0.80                                 |

|          |      |
|----------|------|
| KIF2C    | 0.80 |
| WDHD1    | 0.80 |
| NUSAP1   | 0.80 |
| ANLN     | 0.80 |
| FAM72B   | 0.80 |
| TICRR    | 0.80 |
| RAD54L   | 0.79 |
| SHCBP1   | 0.79 |
| WDR76    | 0.79 |
| NDC80    | 0.79 |
| SPAG5    | 0.79 |
| FAM72D   | 0.79 |
| CDCA8    | 0.79 |
| SKA3     | 0.79 |
| RACGAP1  | 0.79 |
| CDK1     | 0.78 |
| CENPA    | 0.78 |
| FEN1     | 0.78 |
| FOXM1    | 0.78 |
| LMNB1    | 0.78 |
| MCM4     | 0.78 |
| MCM2     | 0.78 |
| MKI67    | 0.78 |
| KIF18B   | 0.78 |
| CCNB2    | 0.78 |
| ESPL1    | 0.78 |
| CDT1     | 0.78 |
| CDCA2    | 0.78 |
| GTSE1    | 0.78 |
| CASC5    | 0.78 |
| HJURP    | 0.78 |
| PRR11    | 0.78 |
| ERCC6L   | 0.78 |
| SKA1     | 0.78 |
| KIAA1524 | 0.78 |
| UHRF1    | 0.78 |
| CDC25C   | 0.77 |
| XRCC2    | 0.77 |
| KIF20A   | 0.77 |
| NUF2     | 0.77 |
| ZNF367   | 0.77 |
| NCAPG2   | 0.77 |
| CEP55    | 0.77 |
| SPC24    | 0.77 |
| FAM111B  | 0.77 |
| SPC25    | 0.77 |
| BLM      | 0.76 |
| CCNB1    | 0.76 |
| CDC25A   | 0.76 |



|          |      |
|----------|------|
| CDC20    | 0.76 |
| HMMR     | 0.76 |
| KPNA2    | 0.76 |
| MAD2L1   | 0.76 |
| MYBL2    | 0.76 |
| RAD51    | 0.76 |
| TYMS     | 0.76 |
| CDC45    | 0.76 |
| KIF20B   | 0.76 |
| POLQ     | 0.76 |
| ESCO2    | 0.76 |
| ASF1B    | 0.76 |
| IQGAP3   | 0.76 |
| SGOL2    | 0.76 |
| AUNIP    | 0.75 |
| RAD51AP1 | 0.75 |
| DEPDC1B  | 0.75 |
| UBE2T    | 0.75 |
| MTFR2    | 0.74 |
| PKMYT1   | 0.74 |
| GIN51    | 0.74 |
| KIF18A   | 0.74 |
| DDIAS    | 0.74 |
| ATAD2    | 0.74 |
| CDKN3    | 0.73 |
| EME1     | 0.73 |
| DSCC1    | 0.73 |
| CENPU    | 0.73 |
| SMC2     | 0.73 |
| GSG2     | 0.73 |
| GIN54    | 0.73 |
| BIRC5    | 0.72 |
| FANCB    | 0.72 |
| AURKA    | 0.72 |
| TIMELESS | 0.72 |
| AURKB    | 0.72 |
| CDC7     | 0.72 |
| CHAF1B   | 0.72 |
| CENPO    | 0.72 |
| CHAF1A   | 0.72 |
| TROAP    | 0.72 |
| ATAD5    | 0.72 |
| FAM64A   | 0.72 |
| ORC6     | 0.72 |
| CENPL    | 0.72 |
| CENPH    | 0.72 |
| CENPK    | 0.72 |
| E2F2     | 0.71 |
| INCENP   | 0.71 |

|           |      |
|-----------|------|
| E2F7      | 0.71 |
| RFC4      | 0.71 |
| TCF19     | 0.71 |
| KIAA0101  | 0.71 |
| C17ORF53  | 0.71 |
| TRIP13    | 0.71 |
| DBF4      | 0.71 |
| OIP5      | 0.71 |
| ARHGAP11B | 0.71 |
| C1ORF112  | 0.71 |
| PARPBP    | 0.71 |
| E2F1      | 0.70 |
| FANCD2    | 0.70 |
| POLE2     | 0.70 |
| E2F8      | 0.70 |
| TACC3     | 0.70 |
| CDCA3     | 0.70 |
| PBK       | 0.70 |
| BRCA2     | 0.69 |
| CDK2      | 0.69 |
| ECT2      | 0.69 |
| MCM7      | 0.69 |
| KIF4B     | 0.69 |
| TOPBP1    | 0.69 |
| UBE2C     | 0.69 |
| GIN52     | 0.69 |
| CENPN     | 0.69 |
| CCNE1     | 0.68 |
| EZH2      | 0.68 |
| MCM3      | 0.68 |
| RBL1      | 0.68 |
| TK1       | 0.68 |
| GMPS      | 0.68 |
| CCNE2     | 0.68 |
| KNTC1     | 0.68 |
| FAM83D    | 0.68 |
| CENPW     | 0.68 |
| SASS6     | 0.68 |
| NUP205    | 0.68 |
| FBXO5     | 0.68 |
| CKAP2     | 0.68 |
| POC1A     | 0.68 |
| C5ORF34   | 0.68 |
| GIN53     | 0.68 |
| CCNF      | 0.67 |
| MSH6      | 0.67 |
| RFC3      | 0.67 |
| RRM1      | 0.67 |
| TRAIP     | 0.67 |

|          |      |
|----------|------|
| ZWILCH   | 0.67 |
| MASTL    | 0.67 |
| MND1     | 0.67 |
| DNAJC9   | 0.67 |
| MTBP     | 0.67 |
| PRIM1    | 0.66 |
| RFC5     | 0.66 |
| TMPO     | 0.66 |
| SPDL1    | 0.66 |
| NEIL3    | 0.66 |
| MIS18A   | 0.66 |
| DONSON   | 0.66 |
| DNA2     | 0.65 |
| KPNB1    | 0.65 |
| MSH2     | 0.65 |
| VRK1     | 0.65 |
| NCAPD2   | 0.65 |
| FBXO45   | 0.65 |
| DSN1     | 0.65 |
| NDC1     | 0.65 |
| POLA2    | 0.65 |
| LMNB2    | 0.65 |
| TBC1D31  | 0.65 |
| SUV39H1  | 0.64 |
| WDR62    | 0.64 |
| SAPCD2   | 0.64 |
| R3HDM1   | 0.64 |
| PSMC3IP  | 0.64 |
| CKS1B    | 0.63 |
| FANCG    | 0.63 |
| SKP2     | 0.63 |
| TMPO-AS1 | 0.63 |
| NUP155   | 0.63 |
| C16ORF59 | 0.63 |
| MCM8     | 0.63 |
| PSRC1    | 0.63 |
| MMS22L   | 0.63 |
| CSE1L    | 0.62 |
| H2AFZ    | 0.62 |
| CENPM    | 0.62 |
| TUBA1B   | 0.62 |
| RNASEH2A | 0.62 |
| LIN9     | 0.62 |
| RFWD3    | 0.62 |
| NCAPD3   | 0.62 |
| RAD54B   | 0.62 |
| CTSV     | 0.61 |
| HMGB2    | 0.61 |
| PCNA     | 0.61 |

|          |       |
|----------|-------|
| UNG      | 0.61  |
| C18ORF54 | 0.61  |
| CDCA4    | 0.61  |
| RMI2     | 0.61  |
| KNSTRN   | 0.61  |
| FANCA    | 0.60  |
| GEN1     | 0.60  |
| PPM1G    | 0.60  |
| PPAT     | 0.60  |
| SUV39H2  | 0.60  |
| TIPIN    | 0.60  |
| ARHGEF39 | 0.60  |
| NEMP1    | 0.60  |
| CST3     | -0.60 |
| CRY2     | -0.64 |
| C16ORF89 | -0.64 |

**Table S4.** Gene ontology and KEGG analysis of DTL co-expressed genes

| Category      | Term       |                                      | Fold Enrichment | P-Value   | Bonferroni | Benjamini | FDR       |
|---------------|------------|--------------------------------------|-----------------|-----------|------------|-----------|-----------|
| GOTERM_BP_FAT | GO:0007049 | cell cycle                           | 11.13           | 8.57E-110 | 7.68E-107  | 7.68E-107 | 1.34E-106 |
| GOTERM_BP_FAT | GO:0022403 | cell cycle phase                     | 15.69           | 4.49E-93  | 4.03E-90   | 2.01E-90  | 7.00E-90  |
| GOTERM_BP_FAT | GO:0000279 | M phase                              | 17.91           | 6.72E-89  | 6.03E-86   | 2.01E-86  | 1.05E-85  |
| GOTERM_BP_FAT | GO:0022402 | cell cycle process                   | 12.21           | 1.00E-87  | 8.98E-85   | 2.25E-85  | 1.56E-84  |
| GOTERM_BP_FAT | GO:0000278 | mitotic cell cycle                   | 14.84           | 7.23E-75  | 6.48E-72   | 1.30E-72  | 1.13E-71  |
| GOTERM_BP_FAT | GO:0000280 | nuclear division                     | 20.70           | 1.01E-71  | 9.06E-69   | 1.51E-69  | 1.58E-68  |
| GOTERM_BP_FAT | GO:0007067 | mitosis                              | 20.70           | 1.01E-71  | 9.06E-69   | 1.51E-69  | 1.58E-68  |
| GOTERM_BP_FAT | GO:0000087 | M phase of mitotic cell cycle        | 20.33           | 4.07E-71  | 3.65E-68   | 5.21E-69  | 6.34E-68  |
| GOTERM_BP_FAT | GO:0048285 | organelle fission                    | 19.89           | 2.22E-70  | 1.99E-67   | 2.49E-68  | 3.47E-67  |
| GOTERM_BP_FAT | GO:0051301 | cell division                        | 15.66           | 1.26E-63  | 1.13E-60   | 1.25E-61  | 1.96E-60  |
| GOTERM_BP_FAT | GO:0006259 | DNA metabolic process                | 9.93            | 2.73E-54  | 2.45E-51   | 2.45E-52  | 4.25E-51  |
| GOTERM_BP_FAT | GO:0006260 | DNA replication                      | 17.27           | 2.45E-46  | 2.19E-43   | 1.99E-44  | 3.81E-43  |
| GOTERM_BP_FAT | GO:0007059 | chromosome segregation               | 26.46           | 2.37E-36  | 2.13E-33   | 1.77E-34  | 3.70E-33  |
| GOTERM_BP_FAT | GO:0051726 | regulation of cell cycle             | 9.71            | 4.72E-33  | 4.23E-30   | 3.25E-31  | 7.35E-30  |
| GOTERM_BP_FAT | GO:0006974 | response to DNA damage stimulus      | 8.62            | 1.18E-30  | 1.06E-27   | 7.58E-29  | 1.84E-27  |
| GOTERM_BP_FAT | GO:0006281 | DNA repair                           | 9.67            | 6.03E-28  | 5.40E-25   | 3.60E-26  | 9.39E-25  |
| GOTERM_BP_FAT | GO:0033554 | cellular response to stress          | 5.68            | 1.13E-22  | 1.01E-19   | 6.32E-21  | 1.76E-19  |
| GOTERM_BP_FAT | GO:0000075 | cell cycle checkpoint                | 17.66           | 2.12E-22  | 1.90E-19   | 1.12E-20  | 3.30E-19  |
| GOTERM_BP_FAT | GO:0007017 | microtubule-based process            | 9.00            | 4.94E-22  | 4.42E-19   | 2.46E-20  | 7.69E-19  |
| GOTERM_BP_FAT | GO:0007346 | regulation of mitotic cell cycle     | 12.34           | 9.09E-22  | 8.15E-19   | 4.29E-20  | 1.42E-18  |
| GOTERM_BP_FAT | GO:0010564 | regulation of cell cycle process     | 14.69           | 2.74E-21  | 2.46E-18   | 1.23E-19  | 4.27E-18  |
| GOTERM_BP_FAT | GO:0051276 | chromosome organization              | 5.94            | 6.11E-21  | 5.47E-18   | 2.61E-19  | 9.51E-18  |
| GOTERM_BP_FAT | GO:0000070 | mitotic sister chromatid segregation | 31.62           | 1.71E-20  | 1.53E-17   | 6.96E-19  | 2.66E-17  |
| GOTERM_BP_FAT | GO:0000819 | sister chromatid segregation         | 30.77           | 2.97E-20  | 2.66E-17   | 1.16E-18  | 4.63E-17  |
| GOTERM_BP_FAT | GO:0006261 | DNA-dependent DNA replication        | 20.78           | 4.75E-18  | 4.26E-15   | 1.77E-16  | 7.40E-15  |
| GOTERM_BP_FAT | GO:0007126 | meiosis                              | 14.35           | 1.25E-17  | 1.12E-14   | 4.48E-16  | 1.95E-14  |
| GOTERM_BP_FAT | GO:0051327 | M phase of meiotic cell cycle        | 14.35           | 1.25E-17  | 1.12E-14   | 4.48E-16  | 1.95E-14  |
| GOTERM_BP_FAT | GO:0051321 | meiotic cell cycle                   | 14.06           | 1.91E-17  | 1.71E-14   | 6.57E-16  | 2.97E-14  |
| GOTERM_BP_FAT | GO:0000226 | microtubule cytoskeleton             | 10.93           | 2.11E-17  | 1.89E-14   | 7.00E-16  | 3.29E-14  |
| GOTERM_BP_FAT | GO:0051329 | interphase of mitotic cell cycle     | 12.35           | 1.05E-14  | 9.45E-12   | 3.38E-13  | 1.64E-11  |
| GOTERM_BP_FAT | GO:0051325 | interphase                           | 12.00           | 1.78E-14  | 1.59E-11   | 5.49E-13  | 2.77E-11  |

|               |            |                                                         |       |          |             |          |          |
|---------------|------------|---------------------------------------------------------|-------|----------|-------------|----------|----------|
| GOTERM_BP_FAT | GO:0007051 | spindle organization                                    | 20.84 | 5.60E-14 | 5.02E-11    | 1.67E-12 | 8.73E-11 |
| GOTERM_BP_FAT | GO:0006323 | DNA packaging                                           | 10.30 | 1.38E-12 | 1.24E-09    | 3.99E-11 | 2.15E-09 |
| GOTERM_BP_FAT | GO:0006310 | DNA recombination                                       | 10.84 | 3.04E-12 | 2.72E-09    | 8.51E-11 | 4.74E-09 |
| GOTERM_BP_FAT | GO:0007093 | mitotic cell cycle checkpoint                           | 18.69 | 2.25E-11 | 2.02E-08    | 6.11E-10 | 3.50E-08 |
| GOTERM_BP_FAT | GO:0031570 | DNA integrity checkpoint                                | 15.45 | 2.10E-10 | 1.88E-07    | 5.54E-09 | 3.27E-07 |
| GOTERM_BP_FAT | GO:0008283 | cell proliferation                                      | 4.30  | 3.07E-10 | 2.75E-07    | 7.85E-09 | 4.78E-07 |
| GOTERM_BP_FAT | GO:0051783 | regulation of nuclear division                          | 14.35 | 4.92E-10 | 4.41E-07    | 1.22E-08 | 7.66E-07 |
| GOTERM_BP_FAT | GO:0007088 | regulation of mitosis                                   | 14.35 | 4.92E-10 | 4.41E-07    | 1.22E-08 | 7.66E-07 |
| GOTERM_BP_FAT | GO:0007010 | cytoskeleton organization                               | 4.15  | 1.51E-09 | 1.35E-06    | 3.65E-08 | 2.35E-06 |
| GOTERM_BP_FAT | GO:0006302 | double-strand break repair                              | 12.96 | 1.55E-09 | 1.39E-06    | 3.66E-08 | 2.42E-06 |
| GOTERM_BP_FAT | GO:0030261 | chromosome condensation                                 | 24.11 | 1.80E-09 | 1.61E-06    | 4.13E-08 | 2.80E-06 |
| GOTERM_BP_FAT | GO:0000724 | double-strand break repair via homologous recombination | 28.20 | 6.24E-09 | 5.59E-06    | 1.40E-07 | 9.72E-06 |
| GOTERM_BP_FAT | GO:0000725 | recombinational repair                                  | 28.20 | 6.24E-09 | 5.59E-06    | 1.40E-07 | 9.72E-06 |
| GOTERM_BP_FAT | GO:0000910 | cytokinesis                                             | 16.33 | 6.85E-09 | 6.14E-06    | 1.50E-07 | 1.07E-05 |
| GOTERM_BP_FAT | GO:0051052 | regulation of DNA metabolic process                     | 8.22  | 1.36E-08 | 1.22E-05    | 2.89E-07 | 2.11E-05 |
| GOTERM_BP_FAT | GO:0007076 | mitotic chromosome condensation                         | 36.06 | 1.57E-08 | 1.41E-05    | 3.27E-07 | 2.45E-05 |
| GOTERM_BP_FAT | GO:0048015 | phosphoinositide-mediated signaling                     | 9.13  | 6.99E-08 | 6.26E-05    | 1.42E-06 | 1.09E-04 |
| GOTERM_BP_FAT | GO:0006270 | DNA replication initiation                              | 29.30 | 7.06E-08 | 6.33E-05    | 1.41E-06 | 1.10E-04 |
| GOTERM_BP_FAT | GO:0007018 | microtubule-based movement                              | 7.70  | 1.11E-07 | 9.93E-05    | 2.16E-06 | 1.73E-04 |
| GOTERM_BP_FAT | GO:0051640 | organelle localization                                  | 8.74  | 1.11E-07 | 9.99E-05    | 2.12E-06 | 1.74E-04 |
| GOTERM_BP_FAT | GO:0033043 | regulation of organelle organization                    | 5.25  | 1.48E-07 | 1.33E-04    | 2.77E-06 | 2.31E-04 |
| GOTERM_BP_FAT | GO:0042770 | DNA damage response, signal transduction                | 9.21  | 2.80E-07 | 2.50E-04    | 5.11E-06 | 4.35E-04 |
| GOTERM_BP_FAT | GO:0000077 | DNA damage checkpoint                                   | 12.56 | 4.68E-07 | 4.20E-04    | 8.39E-06 | 7.30E-04 |
| GOTERM_BP_FAT | GO:0031577 | spindle checkpoint                                      | 33.49 | 5.01E-07 | 4.49E-04    | 8.81E-06 | 7.81E-04 |
| GOTERM_BP_FAT | GO:0030071 | regulation of mitotic metaphase/anaphase transition     | 21.31 | 6.11E-07 | 5.47E-04    | 1.05E-05 | 9.52E-04 |
| GOTERM_BP_FAT | GO:0051656 | establishment of organelle                              | 9.71  | 7.74E-07 | 6.93E-04    | 1.31E-05 | 0.001206 |
| GOTERM_BP_FAT | GO:0065004 | protein-DNA complex assembly                            | 8.10  | 9.47E-07 | 8.48E-04    | 1.57E-05 | 0.001475 |
| GOTERM_BP_FAT | GO:0000079 | regulation of cyclin-dependent protein kinase activity  | 11.16 | 1.20E-06 | 0.001071756 | 1.95E-05 | 0.001864 |
| GOTERM_BP_FAT | GO:0006268 | DNA unwinding during replication                        | 28.70 | 1.24E-06 | 0.00110778  | 1.98E-05 | 0.001927 |

|               |            |                                                              |       |          |             |          |          |
|---------------|------------|--------------------------------------------------------------|-------|----------|-------------|----------|----------|
| GOTERM_BP_FAT | GO:0010948 | negative regulation of cell cycle process                    | 18.75 | 1.40E-06 | 0.001251283 | 2.20E-05 | 0.002177 |
| GOTERM_BP_FAT | GO:0051053 | negative regulation of DNA metabolic process                 | 13.74 | 1.48E-06 | 0.00132541  | 2.29E-05 | 0.002306 |
| GOTERM_BP_FAT | GO:0034621 | cellular macromolecular complex subunit organization         | 3.75  | 1.56E-06 | 0.001395403 | 2.37E-05 | 0.002428 |
| GOTERM_BP_FAT | GO:0051303 | establishment of chromosome localization                     | 26.79 | 1.83E-06 | 0.001641215 | 2.74E-05 | 0.002856 |
| GOTERM_BP_FAT | GO:0050000 | chromosome localization                                      | 26.79 | 1.83E-06 | 0.001641215 | 2.74E-05 | 0.002856 |
| GOTERM_BP_FAT | GO:0007052 | mitotic spindle organization                                 | 26.79 | 1.83E-06 | 0.001641215 | 2.74E-05 | 0.002856 |
| GOTERM_BP_FAT | GO:0010212 | response to ionizing radiation                               | 10.05 | 2.73E-06 | 0.002440444 | 4.01E-05 | 0.004248 |
| GOTERM_BP_FAT | GO:0006275 | regulation of DNA replication                                | 9.72  | 3.51E-06 | 0.003142947 | 5.08E-05 | 0.005473 |
| GOTERM_BP_FAT | GO:0032508 | DNA duplex unwinding                                         | 22.32 | 5.04E-06 | 0.004509046 | 7.17E-05 | 0.007857 |
| GOTERM_BP_FAT | GO:0032392 | DNA geometric change                                         | 22.32 | 5.04E-06 | 0.004509046 | 7.17E-05 | 0.007857 |
| GOTERM_BP_FAT | GO:0007094 | mitotic cell cycle spindle assembly checkpoint               | 30.44 | 1.44E-05 | 0.012806877 | 2.01E-04 | 0.022408 |
| GOTERM_BP_FAT | GO:0045841 | negative regulation of mitotic metaphase/anaphase transition | 30.44 | 1.44E-05 | 0.012806877 | 2.01E-04 | 0.022408 |
| GOTERM_BP_FAT | GO:0043933 | macromolecular complex subunit organization                  | 2.55  | 1.90E-05 | 0.016870837 | 2.62E-04 | 0.029579 |
| GOTERM_BP_FAT | GO:0006333 | chromatin assembly or disassembly                            | 5.80  | 1.94E-05 | 0.017227913 | 2.63E-04 | 0.03021  |
| GOTERM_BP_FAT | GO:0051784 | negative regulation of nuclear division                      | 27.90 | 2.13E-05 | 0.018928393 | 2.85E-04 | 0.03322  |
| GOTERM_BP_FAT | GO:0045839 | negative regulation of mitosis                               | 27.90 | 2.13E-05 | 0.018928393 | 2.85E-04 | 0.03322  |
| GOTERM_BP_FAT | GO:0034622 | cellular macromolecular complex assembly                     | 3.58  | 2.16E-05 | 0.0192039   | 2.85E-04 | 0.033708 |
| GOTERM_BP_FAT | GO:0006271 | DNA strand elongation during DNA replication                 | 53.58 | 3.16E-05 | 0.027929722 | 4.10E-04 | 0.04924  |
| GOTERM_CC_FAT | GO:0005694 | chromosome                                                   | 12.00 | 8.00E-60 | 1.35E-57    | 1.35E-57 | 9.75E-57 |
| GOTERM_CC_FAT | GO:0000793 | condensed chromosome                                         | 26.97 | 1.99E-53 | 3.36E-51    | 1.68E-51 | 2.42E-50 |
| GOTERM_CC_FAT | GO:0044427 | chromosomal part                                             | 12.54 | 7.46E-53 | 1.26E-50    | 4.20E-51 | 9.09E-50 |
| GOTERM_CC_FAT | GO:0000775 | chromosome, centromeric region                               | 24.40 | 4.12E-44 | 6.97E-42    | 1.74E-42 | 5.02E-41 |
| GOTERM_CC_FAT | GO:0043228 | non-membrane-bounded organelle                               | 3.41  | 6.63E-43 | 1.12E-40    | 2.24E-41 | 8.08E-40 |
| GOTERM_CC_FAT | GO:0043232 | intracellular non-membrane-bounded organelle                 | 3.41  | 6.63E-43 | 1.12E-40    | 2.24E-41 | 8.08E-40 |

|               |            |                                           |       |          |             |          |          |
|---------------|------------|-------------------------------------------|-------|----------|-------------|----------|----------|
| GOTERM_CC_FAT | GO:0005819 | spindle                                   | 19.55 | 9.02E-38 | 1.52E-35    | 2.54E-36 | 1.10E-34 |
| GOTERM_CC_FAT | GO:0000779 | condensed chromosome, centromeric region  | 33.23 | 4.49E-36 | 7.59E-34    | 1.08E-34 | 5.47E-33 |
| GOTERM_CC_FAT | GO:0015630 | microtubule cytoskeleton                  | 7.85  | 3.65E-35 | 6.17E-33    | 7.71E-34 | 4.45E-32 |
| GOTERM_CC_FAT | GO:0000777 | condensed chromosome kinetochore          | 33.90 | 1.75E-32 | 2.95E-30    | 3.28E-31 | 2.13E-29 |
| GOTERM_CC_FAT | GO:0005654 | nucleoplasm                               | 5.32  | 6.39E-29 | 1.08E-26    | 1.08E-27 | 7.79E-26 |
| GOTERM_CC_FAT | GO:0000776 | kinetochore                               | 25.54 | 9.36E-29 | 1.58E-26    | 1.44E-27 | 1.14E-25 |
| GOTERM_CC_FAT | GO:0031981 | nuclear lumen                             | 3.96  | 4.55E-28 | 7.68E-26    | 6.40E-27 | 5.54E-25 |
| GOTERM_CC_FAT | GO:0044430 | cytoskeletal part                         | 4.69  | 1.58E-24 | 2.67E-22    | 2.06E-23 | 1.93E-21 |
| GOTERM_CC_FAT | GO:0070013 | intracellular organelle lumen             | 3.23  | 1.91E-22 | 3.24E-20    | 2.31E-21 | 2.33E-19 |
| GOTERM_CC_FAT | GO:0043233 | organelle lumen                           | 3.16  | 7.73E-22 | 1.31E-19    | 8.71E-21 | 9.43E-19 |
| GOTERM_CC_FAT | GO:0031974 | membrane-enclosed lumen                   | 3.10  | 2.55E-21 | 4.31E-19    | 2.69E-20 | 3.11E-18 |
| GOTERM_CC_FAT | GO:0000228 | nuclear chromosome                        | 11.67 | 7.63E-19 | 1.29E-16    | 7.58E-18 | 9.29E-16 |
| GOTERM_CC_FAT | GO:0005856 | cytoskeleton                              | 3.29  | 2.39E-17 | 4.04E-15    | 2.24E-16 | 2.91E-14 |
| GOTERM_CC_FAT | GO:0005815 | microtubule organizing center             | 7.47  | 2.58E-14 | 4.37E-12    | 2.30E-13 | 3.15E-11 |
| GOTERM_CC_FAT | GO:0005874 | microtubule                               | 6.90  | 1.52E-13 | 2.56E-11    | 1.28E-12 | 1.85E-10 |
| GOTERM_CC_FAT | GO:0005813 | centrosome                                | 7.43  | 1.52E-12 | 2.57E-10    | 1.22E-11 | 1.85E-09 |
| GOTERM_CC_FAT | GO:0005876 | spindle microtubule                       | 28.69 | 1.90E-12 | 3.21E-10    | 1.46E-11 | 2.31E-09 |
| GOTERM_CC_FAT | GO:0000922 | spindle pole                              | 22.25 | 3.74E-10 | 6.31E-08    | 2.75E-09 | 4.55E-07 |
| GOTERM_CC_FAT | GO:0000794 | condensed nuclear chromosome              | 16.98 | 6.21E-10 | 1.05E-07    | 4.38E-09 | 7.57E-07 |
| GOTERM_CC_FAT | GO:0044454 | nuclear chromosome part                   | 9.30  | 6.66E-10 | 1.13E-07    | 4.50E-09 | 8.12E-07 |
| GOTERM_CC_FAT | GO:0030496 | midbody                                   | 33.61 | 1.68E-09 | 2.85E-07    | 1.09E-08 | 2.05E-06 |
| GOTERM_CC_FAT | GO:0005657 | replication fork                          | 21.27 | 6.06E-09 | 1.02E-06    | 3.79E-08 | 7.39E-06 |
| GOTERM_CC_FAT | GO:0000785 | chromatin                                 | 6.05  | 5.77E-08 | 9.76E-06    | 3.48E-07 | 7.04E-05 |
| GOTERM_CC_FAT | GO:0000796 | condensin complex                         | 63.03 | 4.23E-07 | 7.15E-05    | 2.47E-06 | 5.16E-04 |
| GOTERM_CC_FAT | GO:0000940 | outer kinetochore of condensed chromosome | 42.02 | 3.45E-06 | 5.82E-04    | 1.94E-05 | 0.004201 |
| GOTERM_CC_FAT | GO:0031262 | Ndc80 complex                             | 75.63 | 8.84E-06 | 0.001492236 | 4.82E-05 | 0.010769 |
| GOTERM_MF_FAT | GO:0005524 | ATP binding                               | 3.54  | 1.47E-20 | 3.81E-18    | 3.81E-18 | 1.92E-17 |
| GOTERM_MF_FAT | GO:0032559 | adenyl ribonucleotide binding             | 3.49  | 2.96E-20 | 7.66E-18    | 3.83E-18 | 3.86E-17 |
| GOTERM_MF_FAT | GO:0030554 | adenyl nucleotide binding                 | 3.31  | 4.32E-19 | 1.12E-16    | 3.73E-17 | 5.64E-16 |
| GOTERM_MF_FAT | GO:0001883 | purine nucleoside binding                 | 3.26  | 9.33E-19 | 2.42E-16    | 6.04E-17 | 1.22E-15 |
| GOTERM_MF_FAT | GO:0001882 | nucleoside binding                        | 3.24  | 1.32E-18 | 3.42E-16    | 6.84E-17 | 1.72E-15 |
| GOTERM_MF_FAT | GO:0032555 | purine ribonucleotide binding             | 2.89  | 3.10E-16 | 8.63E-14    | 1.44E-14 | 4.33E-13 |



|               |            |                                          |       |          |             |          |          |
|---------------|------------|------------------------------------------|-------|----------|-------------|----------|----------|
| GOTERM_MF_FAT | GO:0032553 | ribonucleotide binding                   | 2.89  | 3.10E-16 | 8.63E-14    | 1.44E-14 | 4.33E-13 |
| GOTERM_MF_FAT | GO:0017076 | purine nucleotide binding                | 2.77  | 2.26E-15 | 5.75E-13    | 8.22E-14 | 2.90E-12 |
| GOTERM_MF_FAT | GO:0000166 | nucleotide binding                       | 2.44  | 3.30E-13 | 8.55E-11    | 1.07E-11 | 4.31E-10 |
| GOTERM_MF_FAT | GO:0003677 | DNA binding                              | 2.17  | 6.38E-10 | 1.65E-07    | 1.83E-08 | 8.33E-07 |
| GOTERM_MF_FAT | GO:0003777 | microtubule motor activity               | 12.73 | 2.05E-09 | 5.30E-07    | 5.30E-08 | 2.67E-06 |
| GOTERM_MF_FAT | GO:0008094 | DNA-dependent ATPase activity            | 14.33 | 2.54E-08 | 6.59E-06    | 5.99E-07 | 3.32E-05 |
| GOTERM_MF_FAT | GO:0003684 | damaged DNA binding                      | 14.70 | 1.40E-07 | 3.63E-05    | 3.03E-06 | 1.83E-04 |
| GOTERM_MF_FAT | GO:0043566 | structure-specific DNA binding           | 7.32  | 1.95E-07 | 5.04E-05    | 3.88E-06 | 2.54E-04 |
| GOTERM_MF_FAT | GO:0003697 | single-stranded DNA binding              | 13.36 | 3.02E-07 | 7.82E-05    | 5.59E-06 | 3.94E-04 |
| GOTERM_MF_FAT | GO:0003774 | motor activity                           | 6.90  | 1.24E-06 | 3.21E-04    | 2.14E-05 | 0.001618 |
| GOTERM_MF_FAT | GO:0003682 | chromatin binding                        | 6.53  | 2.13E-06 | 5.51E-04    | 3.44E-05 | 0.002779 |
| GOTERM_MF_FAT | GO:0004386 | helicase activity                        | 6.42  | 7.93E-06 | 0.002050658 | 1.21E-04 | 0.010353 |
| GOTERM_MF_FAT | GO:0003678 | DNA helicase activity                    | 14.29 | 8.05E-06 | 0.002083748 | 1.16E-04 | 0.01052  |
| GOTERM_MF_FAT | GO:0004674 | protein serine/threonine kinase activity | 3.42  | 1.91E-05 | 0.004927651 | 2.60E-04 | 0.024912 |
| KEGG_PATHWAY  | hsa04110   | Cell cycle                               | 17.36 | 7.15E-32 | 2.57E-30    | 2.57E-30 | 6.38E-29 |
| KEGG_PATHWAY  | hsa03030   | DNA replication                          | 28.25 | 1.53E-17 | 5.51E-16    | 2.75E-16 | 1.36E-14 |
| KEGG_PATHWAY  | hsa04114   | Oocyte meiosis                           | 9.86  | 2.55E-11 | 9.19E-10    | 3.06E-10 | 2.28E-08 |
| KEGG_PATHWAY  | hsa04914   | Progesterone-mediated oocyte maturation  | 8.67  | 3.35E-07 | 1.20E-05    | 3.01E-06 | 2.98E-04 |
| KEGG_PATHWAY  | hsa03430   | Mismatch repair                          | 20.63 | 6.42E-07 | 2.31E-05    | 4.62E-06 | 5.73E-04 |
| KEGG_PATHWAY  | hsa03440   | Homologous recombination                 | 16.95 | 2.26E-06 | 8.14E-05    | 1.36E-05 | 0.002017 |
| KEGG_PATHWAY  | hsa04115   | p53 signaling pathway                    | 8.97  | 5.03E-06 | 1.81E-04    | 2.59E-05 | 0.004485 |

**Table S5. List of genes for which protein levels are altered between the LuADC group that overexpress DTL versus those without DTL overexpression**

| Gene          | Mean protein expression  |                             | Standard deviation of protein expression |                             | p-Value  | q-Value         |
|---------------|--------------------------|-----------------------------|------------------------------------------|-----------------------------|----------|-----------------|
|               | DTL altered group (N=58) | DTL unaltered group (N=457) | DTL altered group (N=58)                 | DTL unaltered group (N=457) |          |                 |
| NAPSA         | -0.15                    | 0.17                        | 0.2                                      | 0.65                        | 2.00E-12 | <b>3.90E-10</b> |
| CCNB1         | 1                        | -0.02                       | 0.8                                      | 0.72                        | 7.75E-11 | <b>7.55E-09</b> |
| PCNA          | 0.29                     | 0.01                        | 0.32                                     | 0.26                        | 7.62E-07 | <b>4.95E-05</b> |
| TFRC          | 0.94                     | 0.05                        | 1.1                                      | 0.76                        | 2.86E-06 | <b>1.13E-04</b> |
| FOXM1         | 0.48                     | 0.03                        | 0.55                                     | 0.38                        | 2.91E-06 | <b>1.13E-04</b> |
| MSH6          | 0.46                     | -0.05                       | 0.66                                     | 0.42                        | 8.34E-06 | <b>2.71E-04</b> |
| TGM2          | -0.14                    | 0.15                        | 0.38                                     | 0.55                        | 2.56E-05 | <b>7.13E-04</b> |
| CCNE1         | 0.32                     | 0.03                        | 0.43                                     | 0.41                        | 7.16E-05 | <b>1.75E-03</b> |
| CCNE2         | 0.19                     | 0.01                        | 0.28                                     | 0.2                         | 1.28E-04 | <b>2.62E-03</b> |
| PRKAA1        | -0.1                     | 0.04                        | 0.22                                     | 0.26                        | 1.46E-04 | <b>2.62E-03</b> |
| MSH2          | 0.27                     | -0.08                       | 0.56                                     | 0.41                        | 1.58E-04 | <b>2.62E-03</b> |
| PDCD4         | -0.47                    | 0.06                        | 0.85                                     | 0.62                        | 1.63E-04 | <b>2.62E-03</b> |
| PRKCD_PS664   | -0.09                    | 0.03                        | 0.19                                     | 0.19                        | 1.75E-04 | <b>2.62E-03</b> |
| STMN1         | 0.26                     | 0.04                        | 0.4                                      | 0.25                        | 8.65E-04 | <b>0.0121</b>   |
| ASNS          | 0.53                     | 0.03                        | 0.94                                     | 0.71                        | 1.28E-03 | <b>0.0166</b>   |
| EIF4EBP1      | 0.32                     | 0.05                        | 0.52                                     | 0.48                        | 1.57E-03 | <b>0.0191</b>   |
| BCL2L11       | 0.34                     | 0                           | 0.71                                     | 0.39                        | 2.58E-03 | <b>0.0296</b>   |
| CAV1          | -0.44                    | 0.16                        | 1.21                                     | 1.16                        | 2.76E-03 | <b>0.0299</b>   |
| CASP7         | 0.54                     | 0.13                        | 0.86                                     | 0.69                        | 3.08E-03 | <b>0.0316</b>   |
| SMAD1         | 0.16                     | 0.01                        | 0.33                                     | 0.19                        | 4.09E-03 | <b>0.039</b>    |
| SERPINE1      | 0.77                     | 0.15                        | 1.32                                     | 1.07                        | 4.34E-03 | <b>0.039</b>    |
| EIF4EBP1_PS65 | 0.13                     | 0.01                        | 0.24                                     | 0.22                        | 4.40E-03 | <b>0.039</b>    |
| NKX2-1        | -1.14                    | -0.15                       | 2.19                                     | 1.33                        | 4.78E-03 | <b>0.0406</b>   |
| PRKCA         | -0.14                    | 0.06                        | 0.44                                     | 0.41                        | 5.95E-03 | <b>0.0483</b>   |
| CD274         | 0.55                     | 0.11                        | 1.06                                     | 1.03                        | 6.35E-03 | <b>0.0495</b>   |
| ADAR          | 0.04                     | 0                           | 0.1                                      | 0.14                        | 6.88E-03 | 0.0516          |
| ERBB3         | -0.11                    | 0.1                         | 0.47                                     | 0.45                        | 7.22E-03 | 0.0521          |
| RPS6KA1       | -0.11                    | 0.08                        | 0.42                                     | 0.4                         | 7.74E-03 | 0.0539          |

|               |       |       |      |      |          |        |
|---------------|-------|-------|------|------|----------|--------|
| KIT           | -0.09 | 0.28  | 0.87 | 0.77 | 9.08E-03 | 0.0611 |
| FN1           | 0.52  | 0.09  | 1.01 | 0.78 | 9.54E-03 | 0.062  |
| PRKCB_PS660   | -0.28 | 0.05  | 0.78 | 0.61 | 9.96E-03 | 0.0626 |
| CDH1          | -0.43 | -0.06 | 0.92 | 0.71 | 0.0106   | 0.0641 |
| PTEN          | -0.21 | -0.04 | 0.4  | 0.39 | 0.0108   | 0.0641 |
| TYMS          | 0.16  | -0.01 | 0.49 | 0.22 | 0.012    | 0.0689 |
| FOXO3_PS318   | -0.07 | 0.01  | 0.21 | 0.17 | 0.0134   | 0.0728 |
| BECN1         | -0.09 | 0     | 0.22 | 0.21 | 0.0134   | 0.0728 |
| BAP1          | 0.08  | -0.05 | 0.35 | 0.3  | 0.0139   | 0.0734 |
| DIABLO        | -0.02 | 0.15  | 0.4  | 0.58 | 0.0146   | 0.0739 |
| EIF4EBP1_PT70 | 0.16  | 0.03  | 0.32 | 0.31 | 0.0148   | 0.0739 |
| CHEK1         | 0.23  | 0.05  | 0.47 | 0.35 | 0.0173   | 0.0843 |
| SETD2         | 0.02  | 0.23  | 0.51 | 0.79 | 0.0205   | 0.0977 |
| CDKN2A        | 0.23  | 0.04  | 0.55 | 0.41 | 0.022    | 0.102  |
| CDK1          | 0.06  | -0.02 | 0.21 | 0.18 | 0.0237   | 0.107  |
| SNAI1         | 0.05  | 0.29  | 0.59 | 1.05 | 0.0243   | 0.107  |
| XRCC1         | 0.12  | 0.02  | 0.28 | 0.23 | 0.0274   | 0.118  |
| KRT5          | -0.06 | 0.02  | 0.23 | 0.38 | 0.0281   | 0.118  |
| EZH2          | 0.11  | 0.04  | 0.21 | 0.21 | 0.0285   | 0.118  |
| BAD_PS112     | -0.13 | -0.01 | 0.37 | 0.27 | 0.0342   | 0.138  |
| ERCC1         | -0.03 | 0.08  | 0.29 | 0.54 | 0.035    | 0.138  |
| MET           | 0.05  | 0.26  | 0.54 | 0.96 | 0.0354   | 0.138  |
| RAF1          | 0.1   | 0.03  | 0.21 | 0.17 | 0.0379   | 0.145  |
| MYH11         | -0.7  | -0.07 | 1.94 | 1.37 | 0.0405   | 0.15   |
| PK1           | -0.06 | 0.01  | 0.23 | 0.19 | 0.0406   | 0.15   |
| RAD51         | 0.1   | -0.01 | 0.34 | 0.28 | 0.0452   | 0.162  |
| CTNNB1        | -0.36 | -0.08 | 0.84 | 0.76 | 0.0458   | 0.162  |
| RAB25         | -0.14 | 0.02  | 0.48 | 0.56 | 0.0478   | 0.166  |
| CLDN7         | -0.04 | 0.23  | 0.85 | 0.93 | 0.0522   | 0.179  |
| MAPK14        | -0.07 | 0.01  | 0.26 | 0.26 | 0.0537   | 0.18   |
| MAPK8_PT183   | -0.01 | 0.05  | 0.22 | 0.25 | 0.0579   | 0.189  |
| ARAF_PS299    | -0.04 | 0.11  | 0.48 | 0.41 | 0.0582   | 0.189  |
| CASP3         | 0.12  | 0.03  | 0.31 | 0.32 | 0.0602   | 0.192  |
| NFE2L2        | 0.1   | 0.04  | 0.24 | 0.23 | 0.0628   | 0.196  |
| RB1           | 0.02  | 0.13  | 0.34 | 0.52 | 0.0632   | 0.196  |
| SMAD3         | 0.09  | 0.03  | 0.21 | 0.17 | 0.0678   | 0.207  |

|              |       |       |      |      |        |       |
|--------------|-------|-------|------|------|--------|-------|
| CDKN1B       | -0.06 | 0.01  | 0.27 | 0.24 | 0.0737 | 0.221 |
| CDKN1A       | 0.14  | 0     | 0.44 | 0.59 | 0.0769 | 0.227 |
| GSK3B        | 0.05  | -0.04 | 0.32 | 0.26 | 0.0794 | 0.228 |
| GSK3A        | 0.05  | -0.04 | 0.32 | 0.26 | 0.0794 | 0.228 |
| CHGA         | -0.05 | 0.01  | 0.26 | 0.24 | 0.0863 | 0.243 |
| CASP8        | 0.05  | 0.2   | 0.5  | 0.74 | 0.0873 | 0.243 |
| RBM15        | 0.1   | -0.06 | 0.63 | 0.52 | 0.1    | 0.275 |
| ACVRL1       | -0.05 | 0.03  | 0.28 | 0.23 | 0.108  | 0.292 |
| TP63         | -0.1  | 0.1   | 0.91 | 0.9  | 0.111  | 0.297 |
| PGR          | 0.01  | 0.08  | 0.27 | 0.24 | 0.115  | 0.302 |
| SCD          | -0.02 | 0.03  | 0.2  | 0.22 | 0.116  | 0.302 |
| BAK1         | 0.06  | 0.02  | 0.19 | 0.17 | 0.129  | 0.33  |
| GAPDH        | 0.24  | 0.03  | 0.89 | 0.88 | 0.139  | 0.353 |
| MYC          | 0.14  | 0.03  | 0.49 | 0.31 | 0.146  | 0.364 |
| LCK          | -0.11 | 0     | 0.47 | 0.35 | 0.147  | 0.364 |
| NF2          | 0.09  | 0.02  | 0.33 | 0.37 | 0.169  | 0.411 |
| RICTOR       | -0.17 | -0.01 | 0.75 | 0.7  | 0.178  | 0.429 |
| ERBB2        | -0.15 | -0.01 | 0.65 | 0.67 | 0.181  | 0.429 |
| EIF4G1       | 0.04  | -0.03 | 0.73 | 0.52 | 0.187  | 0.435 |
| PRKAA1_PT172 | -0.09 | 0.03  | 0.56 | 0.58 | 0.187  | 0.435 |
| ARID1A       | 0.05  | 0     | 0.27 | 0.2  | 0.201  | 0.461 |
| PECAM1       | -0.03 | 0.04  | 0.36 | 0.34 | 0.212  | 0.482 |
| RPTOR        | 0.07  | 0.01  | 0.33 | 0.35 | 0.218  | 0.488 |
| CTNNA1       | -0.01 | 0     | 0.1  | 0.13 | 0.221  | 0.49  |
| ANXA1        | 0.28  | 0.09  | 0.98 | 0.69 | 0.231  | 0.495 |
| RAB11B       | -0.02 | 0.03  | 0.27 | 0.23 | 0.231  | 0.495 |
| RAB11A       | -0.02 | 0.03  | 0.27 | 0.23 | 0.231  | 0.495 |
| AKT3         | -0.24 | -0.12 | 0.63 | 0.59 | 0.241  | 0.495 |
| AKT2         | -0.24 | -0.12 | 0.63 | 0.59 | 0.241  | 0.495 |
| AKT1         | -0.24 | -0.12 | 0.63 | 0.59 | 0.241  | 0.495 |
| TP53BP1      | 0.08  | -0.04 | 0.65 | 0.44 | 0.242  | 0.495 |
| GAB2         | 0.16  | 0.05  | 0.61 | 0.5  | 0.244  | 0.495 |
| CHEK2        | 0.12  | 0.03  | 0.49 | 0.41 | 0.251  | 0.499 |
| CTLA4        | -0.39 | -0.17 | 1.41 | 1    | 0.253  | 0.499 |
| SMAD4        | 0.05  | 0.02  | 0.18 | 0.17 | 0.253  | 0.499 |
| YWHAB        | -0.01 | 0.04  | 0.28 | 0.21 | 0.266  | 0.506 |

|            |       |       |      |      |       |       |
|------------|-------|-------|------|------|-------|-------|
| STAT5A     | -0.11 | 0.01  | 0.71 | 0.66 | 0.268 | 0.506 |
| GATA3      | 0.05  | 0     | 0.3  | 0.2  | 0.269 | 0.506 |
| CDH2       | 0.09  | 0.03  | 0.36 | 0.25 | 0.271 | 0.506 |
| FASN       | 0.17  | 0.04  | 0.7  | 0.74 | 0.272 | 0.506 |
| BAX        | 0.13  | 0.07  | 0.33 | 0.36 | 0.277 | 0.506 |
| MAPK9      | -0.1  | -0.04 | 0.35 | 0.24 | 0.278 | 0.506 |
| ERRFI1     | 0.04  | -0.02 | 0.37 | 0.32 | 0.278 | 0.506 |
| MTOR       | -0.05 | 0.02  | 0.46 | 0.35 | 0.304 | 0.549 |
| MS4A1      | 0.1   | 0.05  | 0.28 | 0.25 | 0.311 | 0.557 |
| PREX1      | -0.02 | 0.03  | 0.32 | 0.26 | 0.317 | 0.559 |
| EEF2       | 0.02  | -0.04 | 0.33 | 0.3  | 0.318 | 0.559 |
| PARK7      | -0.05 | 0.01  | 0.39 | 0.31 | 0.326 | 0.562 |
| AKT3_PS473 | -0.1  | 0.02  | 0.73 | 0.59 | 0.332 | 0.562 |
| AKT2_PS473 | -0.1  | 0.02  | 0.73 | 0.59 | 0.332 | 0.562 |
| AKT1_PS473 | -0.1  | 0.02  | 0.73 | 0.59 | 0.332 | 0.562 |
| RPS6KB1    | 0.04  | -0.03 | 0.49 | 0.32 | 0.341 | 0.573 |
| BID        | 0.05  | 0.01  | 0.26 | 0.2  | 0.359 | 0.598 |
| XRCC5      | 0.04  | -0.03 | 0.5  | 0.38 | 0.366 | 0.603 |
| MACC1      | 0.06  | 0     | 0.48 | 0.58 | 0.369 | 0.603 |
| SQSTM1     | 0.23  | 0.11  | 0.85 | 0.74 | 0.371 | 0.603 |
| PXN        | -0.18 | -0.1  | 0.55 | 0.55 | 0.375 | 0.603 |
| EGFR       | 0.15  | 0.06  | 0.7  | 0.36 | 0.38  | 0.603 |
| XBP1       | -0.04 | 0     | 0.28 | 0.27 | 0.383 | 0.603 |
| BRCA2      | -0.03 | 0     | 0.3  | 0.2  | 0.386 | 0.603 |
| NOTCH1     | 0.02  | -0.01 | 0.26 | 0.21 | 0.387 | 0.603 |
| PDCD1      | -0.06 | 0.01  | 0.61 | 0.54 | 0.39  | 0.603 |
| CDH3       | 0     | -0.06 | 0.41 | 0.33 | 0.396 | 0.608 |
| ITGA2      | 0.12  | 0.04  | 0.63 | 0.42 | 0.401 | 0.611 |
| KEAP1      | 0.09  | 0.04  | 0.41 | 0.51 | 0.409 | 0.619 |
| COPS5      | 0.01  | 0.02  | 0.13 | 0.23 | 0.413 | 0.619 |
| AKT3_PT308 | -0.04 | 0.02  | 0.41 | 0.35 | 0.422 | 0.619 |
| AKT2_PT308 | -0.04 | 0.02  | 0.41 | 0.35 | 0.422 | 0.619 |
| AKT1_PT308 | -0.04 | 0.02  | 0.41 | 0.35 | 0.422 | 0.619 |
| MRE11A     | 0.07  | 0.03  | 0.28 | 0.19 | 0.432 | 0.629 |
| SRC        | 0.07  | 0.03  | 0.3  | 0.32 | 0.445 | 0.639 |
| BRAF       | -0.12 | -0.04 | 0.65 | 0.58 | 0.449 | 0.639 |

|               |       |       |      |      |       |       |
|---------------|-------|-------|------|------|-------|-------|
| AXL           | -0.04 | -0.01 | 0.27 | 0.24 | 0.45  | 0.639 |
| YWHAE         | 0.01  | 0.03  | 0.17 | 0.17 | 0.452 | 0.639 |
| DIRAS3        | 0.01  | 0.02  | 0.14 | 0.16 | 0.468 | 0.657 |
| ERBB3_PY1289  | 0.06  | 0.03  | 0.21 | 0.16 | 0.475 | 0.662 |
| ACACA         | 0.11  | 0.03  | 0.78 | 0.62 | 0.482 | 0.664 |
| PARP1         | 0.02  | 0.05  | 0.31 | 0.39 | 0.483 | 0.664 |
| E2F1          | 0.02  | 0     | 0.17 | 0.21 | 0.489 | 0.666 |
| HSPA1A        | 0.24  | 0.14  | 0.86 | 0.83 | 0.495 | 0.671 |
| YWHAZ         | 0.13  | 0.06  | 0.63 | 0.61 | 0.502 | 0.675 |
| PRDX1         | 0.08  | 0.02  | 0.59 | 0.4  | 0.522 | 0.687 |
| VHL           | -0.24 | -0.09 | 1.45 | 1.44 | 0.523 | 0.687 |
| ETS1          | 0     | 0.03  | 0.28 | 0.22 | 0.524 | 0.687 |
| PIK3R2        | -0.09 | -0.06 | 0.32 | 0.34 | 0.528 | 0.687 |
| PIK3R1        | -0.09 | -0.06 | 0.32 | 0.34 | 0.528 | 0.687 |
| RAF1_PS338    | 0.05  | 0.03  | 0.21 | 0.17 | 0.532 | 0.687 |
| INPP4B        | 0.15  | 0.08  | 0.79 | 0.7  | 0.537 | 0.688 |
| RAD50         | -0.03 | -0.05 | 0.24 | 0.24 | 0.546 | 0.695 |
| MAPK1         | -0.15 | -0.11 | 0.46 | 0.54 | 0.568 | 0.72  |
| WWTR1         | 0.05  | 0.02  | 0.35 | 0.24 | 0.578 | 0.728 |
| YAP1          | 0.05  | 0.09  | 0.44 | 0.36 | 0.587 | 0.729 |
| LCN2          | 0.27  | 0.14  | 1.71 | 1.3  | 0.592 | 0.729 |
| TSC1          | -0.18 | -0.14 | 0.55 | 0.58 | 0.593 | 0.729 |
| NRAS          | -0.03 | -0.01 | 0.18 | 0.14 | 0.599 | 0.729 |
| EEF2K         | -0.06 | -0.02 | 0.5  | 0.44 | 0.6   | 0.729 |
| CCND1         | 0.05  | 0.03  | 0.27 | 0.26 | 0.608 | 0.729 |
| G6PD          | 0.22  | 0.15  | 0.9  | 0.74 | 0.608 | 0.729 |
| IGFBP2        | 0.46  | 0.34  | 1.49 | 1.1  | 0.61  | 0.729 |
| FOXO3         | 0     | 0.02  | 0.19 | 0.18 | 0.621 | 0.739 |
| COL6A1        | 0.12  | 0.15  | 0.53 | 0.53 | 0.653 | 0.772 |
| EIF4EBP1_PT37 | 0.09  | 0.03  | 0.78 | 0.58 | 0.66  | 0.775 |
| DVL3          | -0.01 | -0.03 | 0.24 | 0.26 | 0.672 | 0.782 |
| TIGAR         | 0.09  | 0.06  | 0.41 | 0.35 | 0.674 | 0.782 |
| BIRC2         | 0.02  | 0.01  | 0.17 | 0.19 | 0.679 | 0.784 |
| ATM           | -0.08 | -0.12 | 0.75 | 0.74 | 0.733 | 0.841 |
| ANXA7         | 0.01  | 0     | 0.21 | 0.19 | 0.752 | 0.852 |
| PIK3CA        | -0.01 | 0     | 0.24 | 0.18 | 0.756 | 0.852 |

|            |       |       |      |      |       |       |
|------------|-------|-------|------|------|-------|-------|
| RPS6       | -0.01 | -0.03 | 0.5  | 0.43 | 0.76  | 0.852 |
| SYP        | 0.13  | 0.18  | 1.13 | 0.99 | 0.76  | 0.852 |
| SYK        | 0.02  | 0.05  | 0.67 | 0.48 | 0.776 | 0.864 |
| STK11      | 0.02  | 0.01  | 0.25 | 0.19 | 0.789 | 0.874 |
| BCL2L1     | 0.03  | 0.04  | 0.29 | 0.23 | 0.798 | 0.879 |
| BCL2       | 0.08  | 0.05  | 0.74 | 0.43 | 0.804 | 0.88  |
| RET_PY905  | 0.01  | 0.02  | 0.43 | 0.33 | 0.813 | 0.885 |
| PEA15      | 0.03  | 0.05  | 0.4  | 0.34 | 0.856 | 0.925 |
| TP53       | 0     | 0.02  | 0.63 | 0.53 | 0.864 | 0.925 |
| CASP9      | 0.02  | 0.01  | 0.27 | 0.2  | 0.868 | 0.925 |
| TSC2       | -0.13 | -0.11 | 0.51 | 0.49 | 0.869 | 0.925 |
| ESR1       | 0.12  | 0.11  | 0.77 | 0.44 | 0.872 | 0.925 |
| NRG1       | 0.05  | 0.04  | 0.28 | 0.22 | 0.893 | 0.94  |
| ACACB_PS79 | 0.04  | 0.06  | 0.68 | 0.55 | 0.904 | 0.94  |
| ACACA_PS79 | 0.04  | 0.06  | 0.68 | 0.55 | 0.904 | 0.94  |
| MAP2K1     | 0.03  | 0.02  | 0.38 | 0.33 | 0.906 | 0.94  |
| EIF4E      | 0     | -0.01 | 0.2  | 0.2  | 0.923 | 0.952 |
| TUBA1B     | -0.07 | -0.06 | 0.94 | 0.95 | 0.936 | 0.957 |
| KDR        | -0.01 | -0.02 | 0.72 | 0.56 | 0.937 | 0.957 |
| YBX1       | 0.05  | 0.05  | 0.41 | 0.6  | 0.987 | 0.998 |
| SRSF1      | 0.03  | 0.03  | 0.15 | 0.18 | 0.988 | 0.998 |
| AR         | 0.03  | 0.03  | 0.3  | 0.25 | 0.996 | 0.998 |
| IRS1       | 0.01  | 0.01  | 0.27 | 0.2  | 0.998 | 0.998 |
